1  
2  
3  
4  
5  
6  
7  
8  
9  
10  
11  
12  
13  
14  
15  
16  
17  
18  
19  
20  
21  
22  
23  
24  
25  
26  
27  
28  
29  
30  
31  
32  
33  
34  
35  
36  
37  
38  
39  
40

# Supraorbital whiskers act as wind-antennae in rat anemotaxis

Matias Mugnaini<sup>1,2\*</sup>, Dhruv Mehrotra<sup>1,3,4\*</sup>, Federico Davoine<sup>1,5\*</sup>, Varun Sharma<sup>1,6\*</sup>, Ana Rita Mendes<sup>1,7\*</sup>, Ben Gerhardt<sup>8</sup>, Miguel Concha-Miranda<sup>8</sup>, Michael Brecht<sup>1,8 ‡</sup> & Ann M. Clemens<sup>1,9 ‡</sup>

\* contributed equally

‡ shared senior authorship

<sup>1</sup> Neural Systems & Behavior, Marine Biological Laboratory, 7 MBL Street, Woods Hole, MA 02543 USA

<sup>2</sup> Laboratory of Physiology and Algorithms of the Brain, Leloir Institute (IIBBA-CONICET), Av. Patricias Argentinas 435, Buenos Aires, Argentina.

<sup>3</sup> Integrated Program in Neuroscience, McGill University, 845 Sherbrooke St W, Montreal, QC, Canada

<sup>4</sup> Montreal Neurological Institute and Hospital, McGill University, Montreal, QC, Canada

<sup>5</sup> Instituto de Ingeniería Eléctrica, Facultad de Ingeniería, Universidad de la República, 3RJM+898, Montevideo, Uruguay

<sup>6</sup> School of Biological Sciences & Graduate Program in Quantitative Biosciences, Georgia Institute of Technology, North Ave NW, Atlanta, GA, 30332 USA

<sup>7</sup> Champalimaud Neuroscience Programme; Champalimaud Foundation, Av. Brasília, Doca de Pedrouços, 1400-038 Lisbon, Portugal

<sup>8</sup> Bernstein Center for Computational Neuroscience, Humboldt University of Berlin, Philippstr. 13 Haus 6, 10115 Berlin, Germany

<sup>9</sup> University of Edinburgh, Simons Initiative for the Developing Brain, 1 George Square, EH8 9JZ, Edinburgh, Scotland, United Kingdom

Corresponding authors: MB & AC

Running Title: Wind whiskers

Keywords: barrel cortex, anemotaxis, whisker, supra-orbital vibrissa, biomechanics, micro-CT, neuropixels

41

42 **Abstract**

43

44 **We know little about mammalian anemotaxis, wind-sensing. Recently, however,**  
45 **Hartmann and colleagues showed whisker-based anemotaxis in rats. To**  
46 **investigate how whiskers sense airflow, we tracked whisker tips in anesthetized or**  
47 **cadaver rats under no airflow, low airflow and high (fan-blowing) airflow.**  
48 **Whisker tips showed little movement under no airflow conditions and all whisker**  
49 **tips moved during high airflow. Low airflow conditions – most similar to naturally**  
50 **occurring wind stimuli – engaged whisker tips differentially. Most whiskers**  
51 **moved little, the long supraorbital whisker showed maximal displacement and  $\alpha$ ,**  
52 **A1,  $\beta$ , and  $\gamma$  whiskers also showed movements. The long supraorbital whisker**  
53 **differs from other whiskers in its exposed dorsal position, upward bending, length**  
54 **and thin diameter. *Ex vivo* extracted long supraorbital whiskers also showed**  
55 **exceptional airflow displacement, suggesting whisker-intrinsic biomechanics**  
56 **mediate the unique airflow-sensitivity. Micro computed tomography revealed that**  
57 **the ring-wulst – the follicle structure receiving the most sensitive afferents – was**  
58 **more complete/ closed in supraorbital and other wind-sensitive whiskers than in**  
59 **non-wind-sensitive whiskers, suggesting specialization of the supraorbital for**  
60 **omni-directional sensing. We localized and targeted the cortical supraorbital**  
61 **whisker representation in simultaneous Neuropixels recordings with D/E-row**  
62 **whisker barrels. Responses to wind-stimuli were stronger in the supraorbital**  
63 **whisker representation than in D/E-row barrel cortex. We assessed the behavioral**  
64 **significance of whiskers in an airflow-sensing paradigm. We observed that rats**  
65 **spontaneously turn towards airflow stimuli in complete darkness. Selective**  
66 **trimming of wind-responsive whiskers diminished airflow turning responses more**  
67 **than trimming of non-wind-responsive whiskers. Lidocaine injections targeted to**  
68 **supraorbital whisker follicles also diminished airflow turning responses compared**  
69 **to control injections. We conclude that supraorbital whiskers act as wind**  
70 **antennae.**

71

72 **New and Noteworthy**

73

74 Animals rely on sensory processing of airflow (anemotaxis) to guide navigation and  
75 survival. We examined mechanisms of rat anemotaxis by combining whisker tracking,  
76 biomechanical analysis, micro computed tomography of follicle structure, Neuropixels  
77 recordings in the barrel field, behavior of airflow turning and whisker interference by  
78 trimming and lidocaine injections. This diversity of methods led to a coherent pattern  
79 of results. Whiskers greatly differ in their airflow sensitivity and strongly wind-  
80 responsive whiskers – in particular long supraorbital whiskers – determine behavioral  
81 responses to airflow stimuli in rats.

82

83 **Introduction**

84 Animals can react to airflow stimuli and such wind-sensing abilities are referred to as  
85 anemotaxis. The best studied examples of such behaviors come from insects, where  
86 anemotactic turning has been studied amongst other species in crickets (Tauber &  
87 Camhi 1995; Landolfi & Miller 1995) and in *Drosophila* (Kalmus 1942; Jovanic et al  
88 2019). Crickets show fast (Tauber & Camhi 1995), highly sensitive (Landolfi & Miller  
89 1995) and directional escape responses to airflow stimuli. In *Drosophila*, the antennae  
90 are important transducers of anemotactic reactions (Suver et al. 2019). Until recently,  
91 little was known about the anemotactic abilities of mammals, but Hartmann and  
92 colleagues showed in 2016 (Yu et al 2016) in a conditioning paradigm that rats can  
93 sense airflow. Deficits in airflow sensing after trimming of all whiskers then suggested  
94 that this form of airflow sensing is whisker-mediated. The same authors also  
95 characterized airflow mechanical responses of mystacial whiskers (Yu, Graff &  
96 Hartmann 2016) and responses of rat trigeminal ganglion cells to air flow stimuli (Yan,  
97 Bush & Hartmann 2019).

98 Our work was inspired by the whisker-anemotaxis shown by Hartmann & colleagues.  
99 Rather than focus on the five rows of mystacial whiskers, which are represented in the  
100 famous posteromedial-barrel-subfield (Woolsey & Van der Loos 1970), we decided to  
101 assess the role of all facial whiskers in anemotaxis. The decision to look across different  
102 whisker subfields was based on our experience that whisker subfields may have very  
103 different functional characteristics. The submandibular whisker trident, for example  
104 (The et al 2013), is a three-whisker-array involved in ground sensing. These whiskers  
105 appear to possess biomechanical specializations for ground sensing and may provide  
106 the animal with ego-motion-information about speed and heading direction (The et al.  
107 2013, Chorev et al. 2016). While the mystacial macrovibrissae have been studied in  
108 detail, we know little about the other ~300 whiskers on a rat (Brecht 2007). These  
109 whiskers are organized in arrays (the upper and lower lip microvibrissae, the paw  
110 whiskers, etc.). The few studies on microvibrissae immediately suggested functional  
111 differences between macro- and microvibrissae at the behavioral level (Brecht et al.  
112 1997; Anjum et al. 2006) and the level of cortical representation (Elston, Pow and  
113 Calford 1997).

114 The so-called supraorbital whiskers above the eye are of obvious interest in wind  
115 sensing due to their exposed anatomical positioning. Understanding of whisker function  
116 comes from understanding how whiskers interact in the environment (Grant et al. 2009,  
117 Jadhav and Feldman 2010). Our analysis of whisker diversity in wind sensing took  
118 advantage of recent progress in automated animal tracking, specifically of the  
119 DeepLabCut toolbox (Mathis et al. 2018; Mathis & Mathis 2020). We asked the  
120 following questions: (i) Which whiskers react maximally to airflow stimuli? (ii) Are  
121 whisker airflow responses dependent on whisker biomechanics and sub-structure? (iii)  
122 How do mechanical whisker airflow responses relate to the cortical barrel map? (iv)  
123 How do whiskers contribute differentially to airflow sensitivity?

124 We find that whiskers differ markedly in their airflow responses. In particular, the  
125 supraorbital whiskers respond distinctly when weak airflow stimuli are applied, such  
126 airflow responses reflect the specific whisker biomechanics of the supraorbital

127 whiskers. Micro computed tomography (micro-CT) revealed follicular differences in  
128 supra-orbital and pad whiskers. Recordings with Neuropixels probes show increased  
129 wind response in the supraorbital vs pad barrel field. Finally, rats can sense and localize  
130 weak airflow stimuli and such abilities are diminished by selective whisker trimming  
131 of wind sensitive whiskers or by blocking supraorbital whiskers.

132

133

134

135

136

137

138

139

140

141 **Materials and methods**

142

143 All experiments complied with regulations on animal welfare and were approved  
144 according to German law for animal welfare and approved by the State Office for  
145 Health and Social Affairs committee (LAGeSo) in Berlin (Animal license number:  
146 G0095-21 / 1.2) and Woods Hole, USA (21-10C and 22-09E).

147

148 *Whisker displacement*

149 Passive whisker movements were recorded in five rats (P19–P25), and a total of six  
150 videos were analyzed. Acquisition was performed with a Logitech BRIO, ultra-HD  
151 webcam at 60 frames per second (fps) (Logitech) under low-light conditions with fiber  
152 optic illumination of the facial whiskers. Airflow was directed towards the face and  
153 flow rate was controlled (passive flow and two variable fan speeds). Video tracking  
154 was performed using DeepLabCut (Mathis et al 2018).

155

156 *Micro-CT imaging*

157 Whisker pads *acquired* from 7 male rats (P21—35) were scanned (five to six follicles  
158 per whisker type were obtained). To achieve X-ray visibility of soft tissues, whole  
159 whisker pads were stained in 1% Lugol's solution for 96 h or 1% phosphotungstic acid  
160 (PTA) for 7 days and single vibrissa follicles in 1% Lugol's solution for 48 h, followed  
161 by washing in 0.1 M phosphate buffer (PB) for 1 – 4 h (Metscher, 2009). For fixation  
162 during scanning, samples were embedded in 2 – 4 % agarose and placed in a falcon  
163 tube (whisker pads) or a 1 µl pipette tip (single vibrissa follicle). Micro-CT scans were  
164 performed over a 360° rotation and pictures acquired every 0.2°, with exposure times  
165 between 1 – 2 s, with 40 – 60 kV and 70 – 100 µA with an YXLON FF20 CT system  
166 (YXLON International GmbH, Hamburg Germany) equipped with a Perkin Elmer Y  
167 Panel 4343 CT detector and 190 kV nano focus transmission tube. Helical scans  
168 allowed an effectively extended field of view in case of the whole whisker pad scans.

169

170 *Holotomography reconstructions*

171 Micro-CT scans were reconstructed with the YXLON reconstruction software. Images  
172 were manually segmented in an extended version of the Amira software  
173 (AmiraZIBEdition 2022.17, Zuse Institute Berlin, Germany) and exported labels  
174 visualized with Dragonfly software (Dragonfly 2021.3, Object Research Systems  
175 (ORS) Inc, Montreal, Canada). Adobe Illustrator (Version 26.3.1) was used for the  
176 orientation and presentation of the data.

177

178 *Whisker morphology*

179 Three to four whiskers per whisker type from 6 rats (P19-P25; male=4, female =2; this  
180 number includes the 4 male rats used in the Micro-CT scans) were plucked to measure  
181 the whiskers length and diameter. Representative whisker images from Fig 2 were taken  
182 either with an upright epifluorescence Zeiss microscope (Zen software, blue edition)  
183 with brightfield (5X objective, Zeiss) (Fig 2B, top panel) or using an AVT Pike f421b

184 camera with a 60mm Nikon macro lens (Measurement and Automation Explorer,  
185 National Instruments) (Fig 2B, bottom panel).

186 For length measurements, we used a Sony alpha 7s camera with an FE 2.8/90 Macro G  
187 OSS lens. For the whisker diameter, we used the images taken from the  
188 holotomography reconstructions. Whisker diameter was measured in a transverse  
189 section close to the ring sinus, once the thickness of the initial segment of the whisker  
190 reach a relatively constant thickness.

191

### 192 *Biomechanics*

193 Two whiskers per whisker type from three rats (P19—P25; male=2, female=1) were  
194 plucked for the *ex vivo* assay (right side of the face). Whiskers were inserted by their  
195 base on clay in a linear array facing the same direction. Wind came mostly from the  
196 opposite direction of the resting curvature of the whiskers (see video 2). This was done  
197 to maximize whisker bending and to facilitate measurements, given that we observed  
198 the highest bending in this condition rather than when blowing wind in the same or  
199 perpendicular directions. To prevent wind from blowing directly towards the whiskers,  
200 we placed a plastic tube facing the whiskers 30 cm away from them with a fan placed  
201 on the distal end of the tube, away from the whiskers (the length of the tube was ~70  
202 cm) and a loose paper towel on the proximal end of the tube, near the whiskers to  
203 attenuate wind intensity. The tube and the fan were approximately the same diameter  
204 (15 cm). Bending angle was reconstructed by superimposing two frames of a video  
205 where minimal and maximal deflection of the whisker was achieved. We used 75% of  
206 the total whisker length to trace a radius centered at the base of the whisker to calculate  
207 the bending angle. This procedure was repeated six times, once per whisker type. With  
208 this, we obtained twelve data points per whisker type. Images were acquired using a  
209 Logitech BRIO, ultra HD webcam (90 fps, Logitech).

210

### 211 *Cortical localization of supraorbital whisker barrels*

212 Long Evans rats (P19—P25, n=4) were anesthetized using urethane (1.4 g/kg i.p.).  
213 Incised tissue was locally anesthetized with lidocaine. A rectal probe monitored body  
214 temperature, and a homeothermic blanket (FHC, Bowdoinham, ME, USA) maintained  
215 it at  $37 \pm 0.5^\circ\text{C}$ . For facial whisker barrel experiments, a craniotomy was made above  
216 the somatosensory cortex (3.5 mm posterior to Bregma; 6.5 mm lateral to Bregma).  
217 Broken glass electrodes filled with Ringer solution (NaCl 135, KCl 5.4, MgCl<sub>2</sub> 1,  
218 CaCl<sub>2</sub> 1.8, HEPES 5, in mM) were arranged to enter perpendicular to the cortex. Multi-  
219 unit activity was amplified using an Axoclamp 2B amplifier (Axon Instruments) and  
220 monitored (AM10 Grass Instruments) while moving in step coordinates centered  
221 around 6.3 mm posterior and 3.8 mm lateral to Bregma, and lightly moving the  
222 supraorbital whiskers.

223

### 224 *Neuropixel recordings and wind stimulation*

225 Male Long-Evans rats (n=3) were kept in a temperature and humidity-controlled room  
226 with a 12 hr:12 hr light/dark cycle. Animals were allowed to have free access to clean  
227 food and water in standard rat cages. For surgery, animals were deeply anesthetized by

228 applying intraperitoneal (ip) injections of urethane (1.5g/kg body weight (BW)). The  
229 fur overlying the dorsal aspect of the animal skulls was shaved. Then the rat was placed  
230 in a standard stereotaxic surgical apparatus (Narishige, Japan). The animal's body  
231 temperature was measured with a rectal probe and kept at  $36^{\circ}\text{C} \pm 0.5^{\circ}\text{C}$  by a  
232 homeothermic blanket (FHC, Bowdoinham, Me., USA). Before the surgical incision,  
233 the scalp of the animal was locally anesthetized by injecting 2% lidocaine solution. To  
234 access the barrel cortex, the skin was cut antero- posteriorly along the midline, and the  
235 remaining connective tissue on the skull was removed. The anchoring screws were  
236 inserted to the skull bone and a head-fixation post was then secured to these screws  
237 using UV-curable adhesive glue (Optibond; Altschul Dental, Mainz, Germany) and  
238 dental cement (Heraeus Kulzer, Hanau, Germany). Two Neuropixels probes were glued  
239 together (distance between the probes 2.0 - 2.2 mm), coated with lipophilic  
240 carbocyanine fluorescent dyes DiO or DiI, and lowered slowly into the barrel cortex.  
241 One of the probes targeted the supraorbital whisker area at coordinates 3.8 mm posterior  
242 and 6.3 mm lateral, in a way that the second probe targeted the central whisker pad.  
243 Once the recording was stable, the supraorbital and wind-insensitive whiskers were  
244 stimulated through mechanical and air puff means to confirm the position of both probes.  
245 If no clear response was observed, that is, if no supraorbital and lower whisker pad  
246 response were observed on each of the Neuropixels, the probes were then moved until  
247 the expected supraorbital/whisker pad response was found. Through this procedure, one  
248 of the probes showed responses exclusively during supraorbital stimulation, while the  
249 second probe showed response exclusively for the wind-insensitive whiskers. Finally,  
250 a vent (AITRIP, ECDG054) was positioned in front of the animal at a distance of 12.5  
251 cm and low (0.5 m/s) and high (1.5 m/s) wind stimuli was presented through a balanced  
252 randomized sequence of low, high and no-wind conditions (10 s each, 12 to 30 wind  
253 events per rat).

254

### 255 *Spike Sorting*

256 Spikes were detected from the high-pass filtered data using Kilosort 3.0 (Pachitariu et  
257 al., 2016) and then the output clusters manually adjusted using the “phy” gui  
258 (<https://github.com/cortex-lab/phylib/phy>). Clusters of neurons were assessed  
259 qualitatively in terms of their autocorrelogram (little presence of short-latency ISIs),  
260 spike amplitude and presence of a clear waveform modulation across channels.  
261 Neighboring clusters (up to 10 channels apart) were directly compared between each  
262 other in terms of cross-correlogram, waveform similarity per channel, and firing rate  
263 patterns (the latter, to avoid classifying as separate unit clusters that do not overlap in  
264 time). Clusters with high similarity index were also compared in the same manner. Only  
265 clusters satisfying all these criteria were considered in further analysis.

266

### 267 *Histochemical visualization of barrel patterns*

268 The animals used for whisker mapping and Neuropixels recordings were deeply  
269 anesthetized and perfused transcardially with Ringer solution, followed by 4%  
270 paraformaldehyde (PFA). Brains were removed, hemispheres were separated and

271 cortices were flattened between two glass slides separated by clay spacers. Glass slides  
272 were weighed down with small ceramic weights for about three hours. Afterwards,  
273 flattened cortices were stored overnight in 2% PFA and 80  $\mu\text{m}$  sections were cut on a  
274 vibratome. Sections were stained for cytochrome-oxidase activity using the protocol of  
275 Wong-Riley (1979). Subsequently, barrel shapes were drawn with NeuroLucida  
276 software (MicroBrightfield, Colchester, VT, USA) using a Zeiss Axioplan microscope  
277 fitted with a 10x and 2x objective.

278

### 279 *Wind-sensing behavior*

280 Long Evans rats (P21—P32, male=12; female=13) were separated from littermates  
281 prior to behavioral testing. Behavioral videos were recorded (Basler acA1920, 100 fps)  
282 in a darkened room with the inner chamber covered with blackout curtains. The  
283 behavior box was illuminated with an infrared LED lamp. Two experimenters were  
284 positioned on opposing ends of the testing box and prepared for tests with hands or  
285 flaps in position. Air flow measurements of hand and flap stimuli were on average  $\leq 3$   
286 m/s and 5 m/s respectively. The testing animal was then placed in the center of the  
287 chamber, and a third experimenter cued the experimental flapper by name in a random  
288 sequence every 10 seconds, with a total of 20 trials per session.

289 Whisker trimming or lidocaine/Ringer injections were performed bilaterally in gently  
290 restrained animals under stereoscopic magnification and illumination within 10 minutes  
291 of behavior assessment. Injections were performed subcutaneously and directed to the  
292 area of origin for the supra-orbital whiskers. Wind-sensitive whiskers (2 supraorbital,  
293 the ear, A1,  $\alpha$ ,  $\beta$  and  $\gamma$  whiskers) or wind-insensitive whiskers (C2, C3, D2, D3, D4, E2  
294 and E3) were trimmed with sharp scissors at the base of the skin without disturbing  
295 other whiskers. A day prior to the actual whisker trimming/lidocaine injections, the  
296 animals were habituated to the trimming/injection procedures in sham  
297 trimming/injection procedures in order to minimize stress on the day of the actual  
298 experiment. In such sham procedures, animals were gently restrained, positioned under  
299 the microscope and a pair of scissors was brought close to the animal's face.

300

### 301 *Statistics*

302 Most of our dataset did not satisfy normality criteria, so we applied non-parametric  
303 statistics. We analyzed data from binomial distributions with  $\chi^2$  and Fisher's exact test.  
304 Mann-Whitney, Wilcoxon or Kruskal-Wallis test were employed to analyze two  
305 unpaired groups, two paired groups or more than two unpaired groups, respectively.  
306 Post hoc analysis was carried out using Tukey (Figure S1 and S2) or Dunn's test (Figure  
307 2F). Data was expressed as the root mean square (RMS, Figure 1) or the mean  $\pm$  the  
308 standard error of the mean (SEM), unless indicated. We only report differences which  
309 were significant and relevant to the experiment. In all cases  $p < 0.05$  was the statistical  
310 threshold. The analyses were done using Python 3.7 or MATLAB (MathWorks, Natick,  
311 MA).

312

### 313 *Shuffling statistics of whisker parameters*



314 Chance-level statistics was constructed to determine an optimal arrangement for the  
315 whiskers length-diameter ratio and ring-wulst aperture along the whole supraorbital-  
316 whisker pad region (Figs 2D and 3F, respectively). The arrangement with the least  
317 mean variance, was considered as the optimal and employed as grouping criteria for  
318 further analysis.

319 Six possible arrangements were considered: arcs, rows, semicircles (from A1), oblique  
320 45° (from A1), oblique 135° (from A4) and opposite semicircle (from E4). We first  
321 calculated the variance inside each arrangement group (e.g., inside each semicircle) and  
322 took the mean across them as an estimate of the variance of the whole arrangement. A  
323 p-value for that estimation was then calculated by constructing a shuffle distribution of  
324 the mean variance for that arrangement. To this aim, data points position on the pad  
325 was randomized and the mean variance calculated for that arrangement. This procedure  
326 was repeated 10000 times to create the shuffle distribution. Note that for both variables,  
327 the semicircular arrangement exhibited the least mean variance when comparing the  
328 observed value against the shuffle distribution for that arrangement.

329

330

331 **Results**

332

333 **Differential whisker displacement by airflow**

334 As a first step of our analysis, we assessed the passive displacement of whiskers by  
335 wind stimuli. To this end, we filmed five heads of either deeply urethane-anesthetized  
336 ( $n = 3$ ) or cadaver ( $n = 2$ ) rats under a variety of wind conditions. In four of the heads,  
337 whisker tips with annotated whisker identity were tracked using DeepLabCut (Nath et  
338 al, 2019, see also Movie 1). We identified and tracked ( $> 10$ ) whiskers in all animals.  
339 Accordingly, we labeled several easily identifiable whiskers, such as the long  
340 supraorbitals (ISO), short supraorbitals (sSO), A-row whiskers, alpha, beta, gamma,  
341 and caudal whiskers of the B and C rows (Figure 1A). We recorded videos of rats while  
342 under no wind, ambient (low wind) and fan-blowing (high wind) conditions, and  
343 examined the X- and Y- displacements of each whisker during the three conditions.  
344 Whisker movement was minimal in the no wind condition (Figure 1B), while most  
345 whiskers moved in the high wind condition (Figure 1D). Interestingly, we found that  
346 during the low wind condition, only specific whiskers showed marked displacement  
347 compared to the others; these were the long whiskers, predominantly the ISO, A1 and  
348  $\alpha$  whiskers (Figure 1C, arrows). We further computed the velocity of the whisker  
349 displacement (Figure 1E, F), and found maximal deflections of the long whiskers (ISO,  
350 A1,  $\alpha$ ). We computed the root mean square (RMS) velocity for low wind condition  
351 recordings made from 4 animals and found a consistent trend of highest RMS velocity  
352 deflection for the long whiskers (Figure 1G). In all four video sequences that we  
353 analyzed quantitatively we observed highly significant differences in the amount of  
354 whisker displacement (measured by RMS of velocity) across whiskers (see Figure 1F).  
355 While the details of whisker displacements differed across video sequences, the two  
356 aspects were the same: (i) ISO, A1,  $\alpha$  whiskers as well as closely neighboring whiskers  
357 always showed big displacements; (ii) anterior and middle whiskers of the C and, D  
358 rows and always showed little airflow induced displacements. These aspects are also  
359 captured in our across movies analysis (Figure 1G). In addition to the quantitatively  
360 analyzed movies shown in Figure 1, we also inspected a variety of additional rat head  
361 movies qualitatively. These movies included videos of head side views and movies of  
362 upside-down heads. All of these recordings led to similar qualitative conclusions.  
363 Notably, in all of our experiments, the ISO showed very strong and usually the maximal  
364 deflection, prompting us to further examine the function of the ISO in detail with  
365 regards to anemotaxis in rats.

366

367 **Differential whisker biomechanics determine airflow responses**

368 We wondered how the differential responses of whiskers to airflow arise. To address  
369 this question, we first visually inspected whiskers with differing airflow responses.  
370 Differential characteristics were readily visible and immediately noted that the ISO  
371 whisker was unusually thin for its length (Figure 2A). Such differences were confirmed  
372 when we acquired micrographs of full whiskers (Figure 2B bottom) and their shafts  
373 (Figure 2B top). We further characterized the detailed characteristics by plucking some

374 wind-responsive and non-wind-responsive whiskers. Total whisker length and diameter  
375 were measured in wind and non-wind-engaged whiskers (Figure 2C). We computed the  
376 Spearman's rank correlation coefficient to examine the relationship between whisker  
377 length and base diameter, and found a positive correlation between the two variables [ $r$   
378 (26) = 0.8,  $p < 0.001$ ] (Figure 2C). ISO whiskers were relatively thin and short amongst  
379 the long whiskers (Arc 1, 2 and the straddlers) and display a clear difference with  
380 respect to the small supraorbital and the shorter whiskers (Arc 3 and 4). We computed  
381 a heatmap of the ratio between whisker length and base diameter and found that ISO  
382 has the highest ratio (Figure 2D). We grouped the different whisker types according to  
383 a semicircular arrangement and compared their fold change for that ratio with respect  
384 to the ISO whisker. Semicircles were found to minimized the mean variance of the ratio  
385 along the whisker pad when compared to other possible arrangements using shuffling  
386 statistics. Further statistical analysis confirmed that ISO exhibits the highest ratio (Fig.  
387 S1). This result suggests that optimal wind-engaging occurs within a length-base  
388 diameter range that includes supraorbital and top semicircle whiskers. To test if whisker  
389 biomechanics are indeed sufficient to determine differential airflow responses, we  
390 performed *ex vivo* experiments on extracted whiskers (Figure 2E). To this end, we  
391 inserted the base of a similar sample of wind and non-wind-engaged whiskers in clay  
392 on a linear array with similar orientation. We calculated the maximal bending of the  
393 whiskers during low wind flow with respect to the curvature at rest and took the bending  
394 angle (Figure 2E–F; see methods). A Kruskal-Wallis test on whisker type showed a  
395 significant effect [ $H(5, 42) = 36.45$ ,  $p < 0.0001$ ]. Dunn's post-hoc test indicated that  
396 only comparisons involving ISO and A1 whiskers yielded significant differences.  
397 Particularly, bending angle of ISO significantly differs from every other whisker (all  $p$ -  
398 values  $< 0.02$ ) except A1, which was another wind sensitive whisker found in our  
399 previous *in vivo* assay. A1 differed from C3 and E1 ( $p$  values  $< 0.01$ ). Taken together,  
400 our results identify whisker biomechanics as crucial determinants of airflow responses.

401

#### 402 **The follicles of wind-sensitive whiskers have an unusually closed ring-wulst**

403 We next compared the follicle structure of wind-sensitive and non-wind-sensitive  
404 whiskers. To this end, we obtained high-resolution microCT scans of whisker follicles  
405 either *in situ* in entire iodine-stained whisker pads or in extracted single iodine-stained  
406 follicles. Our analysis was informed by the seminal work of Tonomura et al. 2015.  
407 These authors identified structure-function relationships in vibrissa follicle and showed  
408 that afferents with club-like endings, which are exclusively found adjacent to the ring-  
409 wulst, are the most sensitive follicle afferents with the highest discharge rates. We  
410 reckon that such ring-wulst afferents are most likely to respond to wind stimuli, which  
411 do not even evoke a visible deflection in many whiskers. We show a volume rendering  
412 of the follicle of the long supra-orbital whisker follicle, a highly wind-sensitive whisker  
413 in Figure 3A and of the E1 whisker follicle, a non-wind-sensitive whisker in Figure 3B.  
414 The two whiskers differ in their ring-wulst, which we reconstructed via manual  
415 segmentation, high-lighted by color in the volume image and which we show in  
416 isolation in Figure 3C. Wind-sensitive whiskers have relatively closed ring-wulst  
417 (Figure 3C), whereas non-wind-sensitive whiskers tend to have an open ring-wulst

418 (Figure 3D). Population data on ring-wulst opening are plotted in Figure 3E—F. Note  
419 the similarity of ‘ring-wulst-closedness’ (Figure 3E) and wind-induced deflection as  
420 shown in Figure 1. A heat map of ring wulst aperture angles indicate the most closed  
421 aperture in ISO and sSO follicles, while the most open aperture conformations are found  
422 in E-row and arch-4 follicles (Figure 3F). We grouped the different whisker types  
423 according to a semicircular arrangement and compared their fold change for the ring-  
424 wulst aperture with respect to the ISO whisker. Semicircles were found again to  
425 minimized the mean variance when compared to other possible arrangements using  
426 shuffling statistics, but this time for the ring-wulst aperture. Further statistical analysis  
427 confirmed that ISO exhibits the closest ring-wulst (Fig. S2A). Interestingly, we found  
428 that the ratio between whisker length and diameter (but not if taken separately) was  
429 inversely correlated with the ring-wulst aperture, this is: the closest the ring-wulst, the  
430 highest the ratio (Fig. S2B). We conclude that the follicles of wind-sensitive whiskers  
431 differ by an unusually closed ring-wulst from non-wind-sensitive whiskers.

432

### 433 **Mapping of supra-orbital whisker barrels and relation of whisker airflow** 434 **displacement to the cortical barrel map**

435 The differential mechanical airflow responses of whiskers point towards a role of the  
436 supraorbital whiskers in airflow sensing. We therefore mapped the location of cortical  
437 barrels representing the supraorbital whiskers in extracellular receptive field mapping  
438 experiments and prepared cytochrome oxidase sections of layer 4 of the barrel cortex  
439 (Figure 4A). We consistently (in four out of four mapping experiments) observed  
440 supraorbital whisker responses in brain regions posterior to the A1 and  $\alpha$  whisker  
441 response areas. Also, the stereotaxic coordinates of supraorbital whiskers were highly  
442 consistent ( $6.26 \pm 0.01$  mm lateral and  $3.75 \pm 0.20$  mm posterior to bregma, mean  $\pm$   
443 standard error of the mean). These observations led us to a suggestion for the location  
444 of the supraorbital whisker barrels in relation to the rest of the barrel field (Figure 4B).  
445 Next, we wondered how mechanical airflow responsiveness relates to the cortical barrel  
446 field and we color coded it and superimposed to the barrel map (Figure 4C).  
447 Quantitative tracking data for whisker displacement was not available for all whiskers  
448 (hence the empty barrels), but it was nonetheless clear that wind-responsive whiskers  
449 (with large air flow displacements) cluster in the posterolateral barrel map.

450 We also inspected the putative supraorbital whisker barrels in many ( $n = 10$ ) additional  
451 barrel maps that we derived for other purposes in previous studies (Lenschow et al  
452 2016; Lenschow, Sigl-Glöckner, & Brecht 2017). We made the following observations:  
453 (i) the exact position and orientation of putative supraorbital whisker barrels relative to  
454 the posteromedial-barrel-subfield is somewhat variable and more variable relative to  
455 the position and orientation of the mystacial barrels to each other. (ii) Putative  
456 supraorbital whisker barrels are elongated. (iii) Putative supraorbital whisker barrels  
457 are always close (see also Figure 4A–B). (iv) The septum separating putative  
458 supraorbital whisker barrels is weaker than the septum separating mystacial barrels (see  
459 also Figure 4A–B). The latter two observations support the idea that the short and long  
460 supraorbital whiskers are functionally related.

461

462 **Neurons in the supra-orbital whisker representation responds more strongly to**  
463 **wind stimuli than E/D-row barrel cortex neurons**

464 Next, we wondered if the cortical supra-orbital whisker representation differed from  
465 barrel cortex neurons in their responses to wind stimuli. To this end, we applied wind  
466 stimuli to urethane-anesthetized rats, while recording simultaneously with Neuropixel  
467 probes from the supra-orbital whisker region at the coordinates identified in our  
468 mapping experiments and from the whisker pad region aiming towards E/D-row barrel  
469 cortex (Figure 5A). We histologically confirmed recording locations to the supraorbital  
470 cortical region and the whisker pad barrel cortex near E/D-row (Figure 5B). Judging by  
471 the population peri-stimulus time histogram (PSTH), there was not much of a wind-  
472 evoked response in recordings from E/D-row barrel cortex. In contrast, there was a clear  
473 excitatory response in the supra-orbital whisker region (Figure 5C). Plots of the z-  
474 scored responses of individual neurons revealed either no, weak, or inhibitory responses  
475 to wind-stimuli in E/D-row barrel cortex. In the supra-orbital whisker region, we  
476 observed strong excitatory responses in single cells (Figure 5D). The differences in  
477 wind responses between the supra-orbital region and the whisker pad region were  
478 highly significant (Figure 5E) and distributed differently across response categories  
479 (Figure 5F). We conclude that wind responses map to the supra-orbital whisker  
480 representation.

481

482 **Anemotaxic turning in rats**

483 To assess the behavioral capacities for wind-sensing in rats, we developed an airflow  
484 sensing paradigm. To this end, we placed a rat in a box with three compartments  
485 separated by wire-mesh in total darkness, i.e., the box was shielded in a rack with dark  
486 curtains and additionally experiments were conducted in a darkened room. Videos were  
487 acquired using an infrared (IR) light and an IR camera, both positioned above the  
488 experimental box. The rats were placed in the middle compartment and two  
489 experimenters performed repetitive hand-flaps or card-flaps, in either one of the two  
490 lateral compartments (Figure 6A, C). Air flow measurements of hand and flap stimuli  
491 were on average  $\leq 3$  m/s and 5 m/s respectively, measured with an anemometer. The  
492 reactions of rats to hand-flap stimuli (presented randomly every 10 seconds on either  
493 side of the box) were assigned by forced choice to one of three categories: either no  
494 reaction or turning towards the stimulus or turning away from the stimulus. (Figure  
495 6B). Even though rats often showed no reaction, when they did, the animals appeared  
496 to be able to distinguish the side where the hand-flap was delivered. Accordingly, rats  
497 turn significantly more often towards hand-flaps than away from them (Fig. 6B;  
498  $p < 0.001$ ,  $\chi^2$  Test; ‘Turn to’ (31 trials) vs ‘Turn away’ (7 trials)). Next, we wanted to  
499 compare the rats’ reactions to different wind stimuli. Using the same behavioral  
500 paradigm, we changed the wind delivering method by flapping a cardboard piece,  
501 which evokes a more powerful airflow than the hand-flap (Fig. 6C). Again, the animals  
502 consistently showed a higher percentage of responses towards the stimuli side when  
503 compared to turning away responses (Fig. 6D;  $p < 0.001$ ,  $\chi^2$  Test). Strikingly, when  
504 comparing the ‘Turn to’ responses in the two wind delivery methods, we observed a  
505 stronger reactivity of the animals to cardboard-flap than to hand-flap stimuli (Fig. 6C,

506 D;  $p=0.0036$ , Fisher's Exact Test). Our results show that rats can not only sense, but  
507 also turn to airflow stimuli. The strength of the reactions differed between weak (hand-  
508 flap) and strong (cardboard-flap) stimuli. Since we carefully avoided noises associated  
509 to hand-flap or cardboard-flap stimuli and conducted experiments in total darkness, it  
510 is likely that animals indeed sensed airflow. The whisker trimming and lidocaine  
511 injection effects described below show the turning responses observed were indeed at  
512 least partially if not entirely tactile reactions.

513

514 **Wind-whisker trimming and supraorbital whisker blockade interfere with airflow**  
515 **turning responses**

516 Wind-responsive whiskers (2 supraorbitals, ear, A1,  $\alpha$ ,  $\beta$  and  $\gamma$  whiskers), as identified  
517 in our whisker tracking experiments, were trimmed in 7 rats (Figure 7A). A subset of  
518 wind-insensitive whiskers (C2, C3, D2, D3, D4, E2 and E3) were trimmed in 7 different  
519 rats, which had their wind-responsive whiskers intact (Figure 7B). Both sets of  
520 individuals were then submitted to cardboard-flap stimuli in complete darkness and  
521 were filmed (Figure 7C), as described in the previous section. Out of 20 trials, we  
522 counted each individual's number of turns towards the stimulus. We found that on  
523 average, wind-whisker-trimmed individuals turned towards the stimulus 20% of the  
524 time, while non-wind-whisker-trimmed individuals turned towards the stimulus 29%  
525 of the time ( $p=0.02$ , Figure 7D). Thus, removal of wind-responsive whiskers resulted  
526 in a stronger decrease in turning behavior than the removal of wind-insensitive  
527 whiskers.

528 We next asked if supraorbital whiskers alone play a role in wind-induced turning. To  
529 investigate this, we injected 8 individuals with either lidocaine or Ringer solution (as a  
530 negative control) locally at their supraorbital whisker follicles and followed this with  
531 an injection of the respective other solution 24 hours later (Figure 7E). After each  
532 injection, we subjected the animals to the cardboard-flap tests, as illustrated in Figure  
533 5C. Therefore, we have 8 paired trials for each condition. Seven out of eight individuals  
534 showed a decrease in turning behavior for lidocaine when compared with Ringer  
535 solution (Figure 7F). The average turns towards the cardboard-flap stimulus were less  
536 frequent (18%) for lidocaine treatment than for Ringer treatment (23%,  $p=0.039$ ). We  
537 conclude that supraorbital whiskers alone contribute significantly to airflow turning  
538 responses.

539

540 **Discussion**

541

542 **Summary**

543 We studied rat anemotaxis by combining whisker tracking, biomechanical analysis of  
544 whisker airflow responses, follicle analysis, somatosensory cortex recordings,  
545 behavioral analysis of airflow turning and whisker interference by trimming and  
546 lidocaine injections. This diversity of methods led to a coherent pattern of results.  
547 Whiskers greatly differ in their airflow sensitivity and strongly wind-responsive  
548 whiskers – in particular the long supraorbital whiskers – determine behavioral  
549 responses to airflow stimuli in rats.

550

551 **Differential sensitivity of rat whiskers and downstream cortices to airflow**

552 Whisker tracking of large numbers of whiskers (>10) under a variety of airflow  
553 conditions suggested differential sensitivity of rat whiskers to airflow. The sheer  
554 amount of data acquired here reflects the power of tracking software such as  
555 DeepLabCut (Mathis et al. 2018; Mathis & Mathis 2020) without which our analysis  
556 would not have been possible. The patterns of whisker airflow displacement were  
557 remarkably consistent across experiments. First, no airflow (shielded) conditions  
558 largely abolished whisker displacement in anesthetized and cadaver animals, showing  
559 that it is indeed airflow that leads to whisker tip displacement. Second, we found that  
560 strong airflow displaces all whiskers. Third, low airflow conditions lead to a differential  
561 engagement of whisker tips, with some whiskers (in particular the supraorbitals)  
562 showing strong movements. The ‘low’ airflow conditions studied here included simply  
563 ambient airflow in a room with air conditioning or – in a closet – the turning on of a  
564 fan that was not directly aimed towards the whiskers. We realize that such airflow  
565 conditions are not strictly controlled, but they provided nonetheless the most interesting  
566 results, namely very strong whisker displacements in some whiskers (but not others),  
567 when one ‘feels’ barely any or no wind. Data on more controlled airflow whisker  
568 displacements were gathered by Yu, Graff & Hartmann (2016). We think both  
569 controlled airflow whisker displacements as pioneered by Yu, Graff & Hartmann  
570 (2016) and the study of ambient naturalistic airflow as done here provide information  
571 about whisker airflow responses.

572 Our biomechanical analysis enforced the idea of a differential whisker sensitivity to  
573 airflow. First, we found that strongly airflow responsive whiskers such as the  
574 supraorbital and the A1 whiskers are very thin. Second and more interestingly, even the  
575 extracted long supraorbital whisker shows exceptionally strong airflow responses,  
576 partially due to a high whisker length-diameter ratio. The follicles of wind-sensitive  
577 whiskers differ from non-wind-sensitive whiskers by a more closed ring-wulst. Such  
578 ring-wulst differences are of great functional interest, because club-like endings on the  
579 ring-wulst are thought to form the most sensitive whisker afferents (Tonomura et al.  
580 2015). A synopsis of our observations points towards biomechanical specializations  
581 that endow the supraorbital whiskers with strong airflow omni-directional sensing.  
582 Cortical recordings confirmed – in direct comparison with whisker pad region – that  
583 the supraorbital region is particularly wind-sensitive.

584

585 **Rat anemotaxis**

586 Previous work by Yu et al. (2016) established the ability of rats to sense windblown  
587 through tunnels. These abilities were diminished by trimming all facial whiskers (Yu  
588 et al. 2016). Our current work extends our knowledge of rat anemotaxic abilities. We  
589 demonstrate that rats show robust turning responses to both weak (hand-flaps) and  
590 strong (cardboard-flaps) airflow stimuli. Such turning responses confirm that rats can  
591 not only detect but also localize airflow stimuli. The task conditions (total darkness, no  
592 contact/little or no audible sounds) and the diminished airflow responsiveness after  
593 whisker trimming or blockade clearly indicate that tactile stimuli induce anemotaxic  
594 turning. At least for the hand-flap, the evoked airflow currents – which the animals  
595 detect in distances of 10cm or more – is small (measured airflow  $\leq 3$  m/s). Since a hand-  
596 flap is not categorically different from airflows induced by biologically relevant stimuli  
597 (such as a predator), we think such anemotaxic sensing might offer real-world  
598 advantages to nocturnal animals like rats. With the exception of the fact that rats turn  
599 towards rather than away from hand-flap stimuli, our observations remind us of  
600 anemotaxic escape behaviors as they have been described in insects. Indeed, we wonder  
601 if the rat's anemotaxic turning observed by us is also a defensive behavior that guards  
602 the animal against surprise attacks from the side or behind. The idea that supraorbital,  
603 A1 and  $\alpha$  whiskers mediate defensive behaviors matches with their representation in  
604 the medial superior colliculus (Dräger & Hubel 1975), where both visual (Yilmaz &  
605 Meister 2013) and electric stimulation (Dean, Redgrave & Westby 1991) evoke  
606 defensive behaviors such as escape and freezing.  
607 Independent of exact purpose and the underlying neural circuits, we find that  
608 anemotaxic turning is an extremely valuable behavioral assay for wind-sensing in rats.  
609 As it requires no prior conditioning, the robustness of the behavior allowed us to screen  
610 wind-sensing abilities in large numbers ( $> 20$ ) of rats.

611

612 **The supraorbital whiskers as wind antennae**

613 The central conclusion from our work is that whiskers differ in their sensitivity to  
614 airflow stimuli. Specifically, the supraorbital whiskers emerged as key sensors for wind  
615 stimuli from our analysis. These whiskers show maximal displacement to weak airflow  
616 stimuli, a response property that – according to *ex vivo* experiments – reflects the unique  
617 biomechanical properties of these whiskers. The very dorsal position, and the upward  
618 bending very likely further enhances airflow sensitivity. At least in mice, supraorbital  
619 whiskers appear to be actively whisked together with the mystacial whiskers (Severson  
620 et al. 2019). The two supraorbital whiskers are represented in two closely adjacent  
621 cortical barrels. Both whisker trimming and most of all the effects of lidocaine  
622 injections document the functional significance of supraorbital whiskers for airflow  
623 sensing. The reduction of anemotaxic turning after supraorbital lidocaine injections is  
624 a remarkable result, given that these bilateral injections targeted only 4 out of the  
625 roughly 300 rat whiskers.

626



627

628 **Conclusion**

629 Our data adds to the growing evidence that the functional diversity of whiskers enriches  
630 the rat's sensory world (Diamond et al. 2008, Szwed et al 2003). The much-studied  
631 mystacial macrovibrissae seem to serve many functions, the microvibrissae mediate  
632 object contacts, trident whiskers engage in ground sensing and supraorbital whiskers –  
633 according to several lines of evidence provided here – act as wind whiskers.

634

635 **References**

636

637 Anjum F, Turni H, Mulder PG, van der Burg J, Brecht M (2006) Tactile guidance of  
638 prey capture in Etruscan shrews. *Proc Natl Acad Sci U S A* 103: 16544-16549.

639

640 Brecht M, Preilowski B, Merzenich MM (1997) Functional architecture of the  
641 mystacial vibrissae. *Behavioural Brain Research* 84: 81-97.

642

643 Brecht M (2007) Barrel cortex and whisker-mediated behaviors. *Current Opinion*  
644 *Neurobiology* 17: 408-16.

645

646 Chapin JK, Lin CS (1984) Mapping the body representation in the SI cortex of  
647 anesthetized and awake rats. *J Comp Neurol* 229:199-213.

648

649 Chorev, E., Preston-Ferrer, P., & Brecht, M. (2016). Representation of egomotion in  
650 rat's trident and E-row whisker cortices. *Nature neuroscience*, 19(10), 1367-1373.

651

652 Dean, P., Redgrave, P., & Westby, G. M. (1989). Event or emergency? Two response  
653 systems in the mammalian superior colliculus. *Trends in neurosciences*, 12(4), 137-  
654 147.

655

656 Diamond, Mathew E., et al. "'Where'and'what'in the whisker sensorimotor system."  
657 *Nature Reviews Neuroscience* 9.8 (2008): 601-612.

658

659 Dräger, U. C., & Hubel, D. H. (1975). Responses to visual stimulation and  
660 relationship between visual, auditory, and somatosensory inputs in mouse superior  
661 colliculus. *Journal of Neurophysiology*, 38(3), 690-713.

662

663 Elston GN, Pow DV, Calford MB (1997) Neuronal composition and morphology in  
664 layer IV of two vibrissal barrel subfields of rat cortex. *Cerebral Cortex* 7:422-431.

665

666 Grant, R. A., Mitchinson, B., Fox, C. W., & Prescott, T. J. (2009). Active touch sensing  
667 in the rat: anticipatory and regulatory control of whisker movements during surface  
668 exploration. *Journal of neurophysiology*, 101(2), 862-874

669

670 Jadhav, Shantanu P., and Daniel E. Feldman. "Texture coding in the whisker system."  
671 *Current opinion in neurobiology* 20.3 (2010): 313-318.

672

673 Jovanic, T., Winding, M., Cardona, A., Truman, J. W., Gershow, M., & Zlatic, M.  
674 (2019). Neural substrates of *Drosophila* larval anemotaxis. *Current Biology*, 29(4),  
675 554-566.

676

677 Kalmus, H. (1942). Anemotaxis in *Drosophila*. *Nature*, 150 (3805), 405-405.

678

- 679 Landolfi, M. A., & Miller, J. P. (1995). Stimulus-response properties of cricket cereal  
680 filiform receptors. *Journal of Comparative Physiology A*, 177(6), 749-757.  
681
- 682 Lenschow, C., Copley, S., Gardiner, J. M., Talbot, Z. N., Vitenzon, A., & Brecht, M.  
683 (2016). Sexually monomorphic maps and dimorphic responses in rat genital  
684 cortex. *Current Biology*, 26(1), 106-113.  
685
- 686 Lenschow, C., Sigl-Glöckner, J., & Brecht, M. (2017). Development of rat female  
687 genital cortex and control of female puberty by sexual touch. *PLoS biology*, 15(9),  
688 e2001283.  
689
- 690 Mathis, A., Mamidanna, P., Cury, K. M., Abe, T., Murthy, V. N., Mathis, M. W., &  
691 Bethge, M. (2018). DeepLabCut: markerless pose estimation of user-defined body  
692 parts with deep learning. *Nature neuroscience*, 21(9), 1281-1289.  
693
- 694 Mathis, Mackenzie Weygandt, and Alexander Mathis. "Deep learning tools for the  
695 measurement of animal behavior in neuroscience." *Current opinion in*  
696 *neurobiology* 60 (2020): 1-11.  
697
- 698 Metscher, B.D., (2009). MicroCT for comparative morphology: simple staining  
699 methods allow high-contrast 3D imaging of diverse non-mineralized animal tissues.  
700 *BMC Physiol.* 9: p. 11.  
701
- 702 Nath, T., Mathis, A., Chen, A. C., Patel, A., Bethge, M., & Mathis, M. W. (2019).  
703 Using DeepLabCut for 3D markerless pose estimation across species and  
704 behaviors. *Nature protocols*, 14(7), 2152-2176.  
705
- 706 Severson, K. S., Xu, D., Yang, H., & O'Connor, D. H. (2019). Coding of whisker  
707 motion across the mouse face. *Elife*, 8, e41535.  
708
- 709 Suver, M. P., Matheson, A. M., Sarkar, S., Damiata, M., Schoppik, D., & Nagel, K. I.  
710 (2019). Encoding of wind direction by central neurons in *Drosophila*. *Neuron*, 102(4),  
711 828-842.  
712
- 713 Szwed M, Bagdasarian K, Ahissar E (2003) Encoding of Vibrissal Active Touch.  
714 *Neuron* 40:621–630.  
715
- 716 Tauber, E. R. A. N., & Camhi, J. (1995). The wind-evoked escape behavior of the  
717 cricket *Gryllus bimaculatus*: integration of behavioral elements. *The Journal of*  
718 *experimental biology*, 198(9), 1895-1907.  
719
- 720 Thé L, Wallace ML, Chen CH, Chorev E, Brecht M (2013) Structure, function, and  
721 cortical representation of the rat submandibular whisker trident. *J*  
722 *Neurosci* 33(11):4815-24.  
723

- 724 Tonomura, S., Ebara, S., Bagdasarian, K., Daisuke, U. T. A., Ahissar, E., Inbal, M. E.  
725 I. R., ... & Kumamoto, K. (2015). Structure-function correlations of rat trigeminal  
726 primary neurons: Emphasis on club-like endings, a vibrissal  
727 mechanoreceptor. *Proceedings of the Japan Academy, Series B*, 91(10), 560-576.  
728
- 729 Woolsey TA, Van Der Loos H (1970) The structural organization of layer IV in the  
730 somatosensory region (SI) of mouse cerebral cortex. The description of a cortical field  
731 composed of discrete cytoarchitectonic units. *Brain Research* 17:205–242.  
732
- 733 Yan, S. W., Bush, N. E., & Hartmann, M. J. (2019). Whisker vibrations and the  
734 activity of trigeminal primary afferents in response to airflow. *Journal of*  
735 *Neuroscience*, 39(30), 5881-5896.  
736
- 737 Yilmaz, M., & Meister, M. (2013). Rapid innate defensive responses of mice to  
738 looming visual stimuli. *Current Biology*, 23(20), 2011-2015.  
739
- 740 Yu, Y. S., Graff, M. M., Bresee, C. S., Man, Y. B., & Hartmann, M. J. (2016).  
741 Whiskers aid anemotaxis in rats. *Science Advances*, 2(8), e1600716.  
742
- 743 Yu, Y. S., Graff, M. M., & Hartmann, M. J. (2016). Mechanical responses of rat  
744 vibrissae to airflow. *Journal of Experimental Biology*, 219(7), 937-948.  
745  
746

747 **Acknowledgements:**

748 This work was supported by the Marine Biological Laboratory, a training grant from  
749 the NIMH (R25MH059472), Humboldt Universität zu Berlin, the Bernstein Center for  
750 Computational Neuroscience Berlin, the German federal ministry of education and  
751 research. Ann Clemens is supported by the Simons Initiative for the Developing Brain,  
752 the University of Edinburgh and a Simons Edinburgh Scientific Academic Track  
753 (Simons- ESAT) fellowship. Ana Rita Mendes was supported by QuantOCancer and  
754 The Grass Foundation and Dhruv Mehrotra was supported by The Grass Foundation to  
755 attend the Neural Systems & Behavior Course (NS&B). Federico Davoine was  
756 supported by the Stanley W. Watson Education Fund to attend NS&B. Matías Mugnaini  
757 was supported by an IBRO-USCRC Fellowship to attend NS&B. We thank Alberto  
758 Pereda, Stephanie White, Rosalie Maltby, Rose Holzhauser, Juliana Rhee, Duncan  
759 Leitch and the Neural Systems & Behavior folks.

760

761

762

763

764 **Figures**

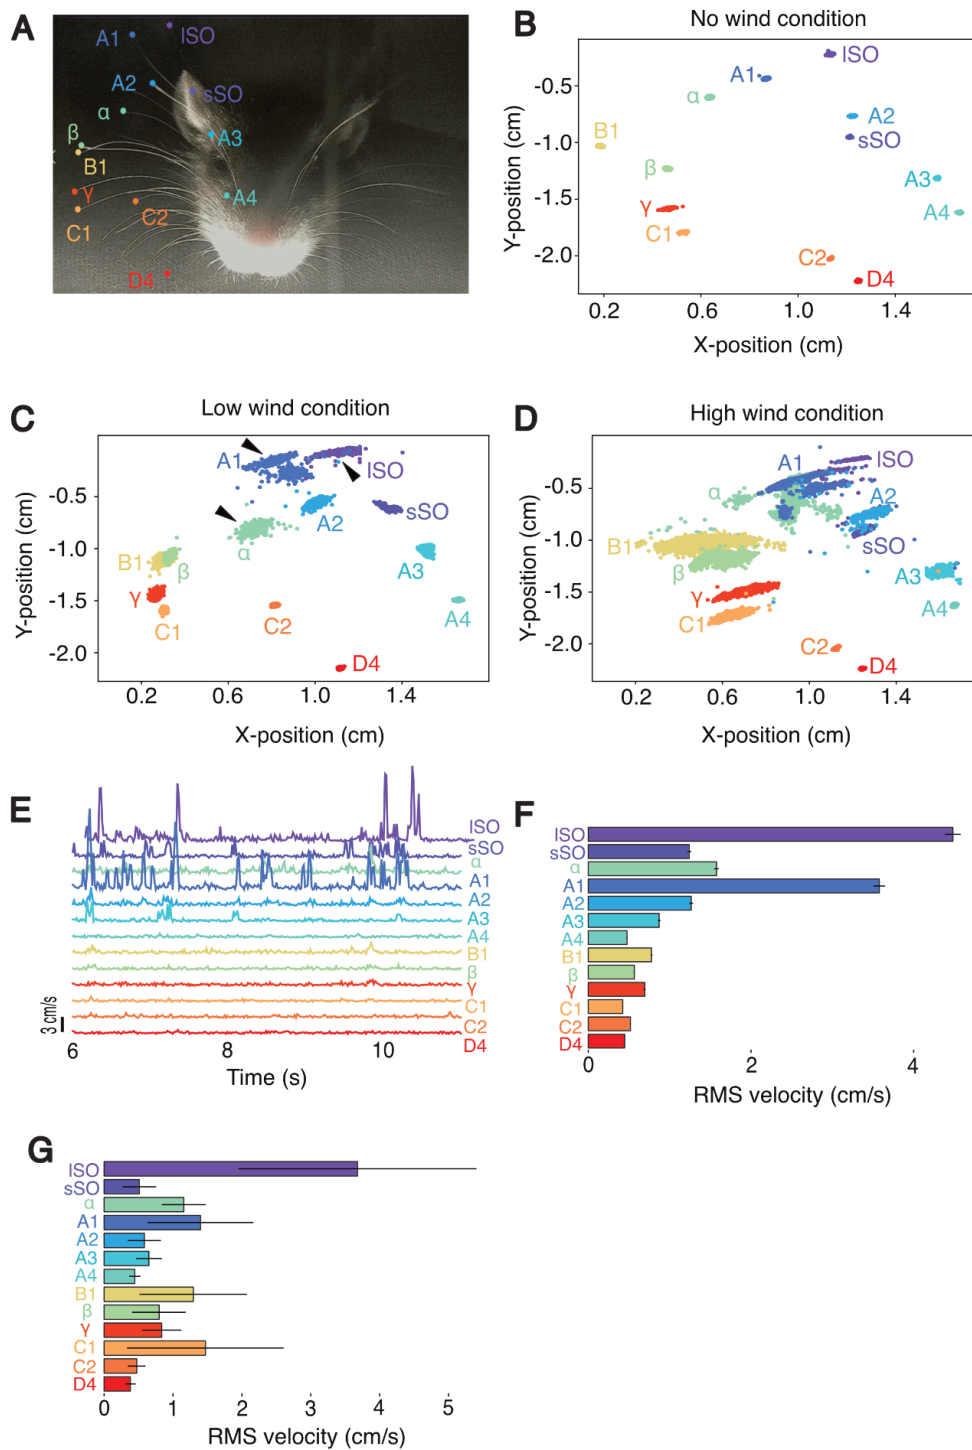

765

766 **Figure 1. Differential displacement of rat whiskers responses to air flow**

767 **A**, Head of a deeply anesthetized rat with whisker tips tracked by DeepLabCut. (See

768 also Movie 1).

769 **B**, Tracked X- and Y-coordinates of whisker tips under no airflow conditions, i.e., when  
770 the rat head was filmed in a small (ca. 1.5 m<sup>2</sup>) locked closet. Whiskers are stationary  
771 during the no wind condition.

772 **C**, Tracked X- and Y-coordinates of whisker tips under low airflow conditions, i.e.,  
773 when the rat head was filmed in a small (ca. 1.5 m<sup>2</sup>) closet with fan turned on at its  
774 lowest speed, and was directed away from the head. Whiskers are stationary during the  
775 no-wind condition. Note the selective deflection of long supraorbital (ISO), A1 and  $\alpha$   
776 whiskers (black arrows) during the low wind condition.

777 **D**, Tracked X- and Y-coordinates of whisker tips under high airflow conditions, i.e.  
778 when the rat head was filmed with the fan directed to the head.

779 **(E)**, Example velocity traces for all labeled whiskers during the low wind condition  
780 shown in **(C)**.

781 **(F)**, Root mean square (RMS) velocity  $\pm$  SEM for all tracked whiskers in the low wind  
782 condition shown in **(C)**. Differences in RMS values across whiskers were statistically  
783 highly significant ( $p < 0.000001$ ; non-parametric one-way ANOVA).

784 **(G)** RMS velocity  $\pm$  SEM across several animals ( $n = 4$  animals), shows consistent  
785 deflection of the ISO in low wind conditions.

786

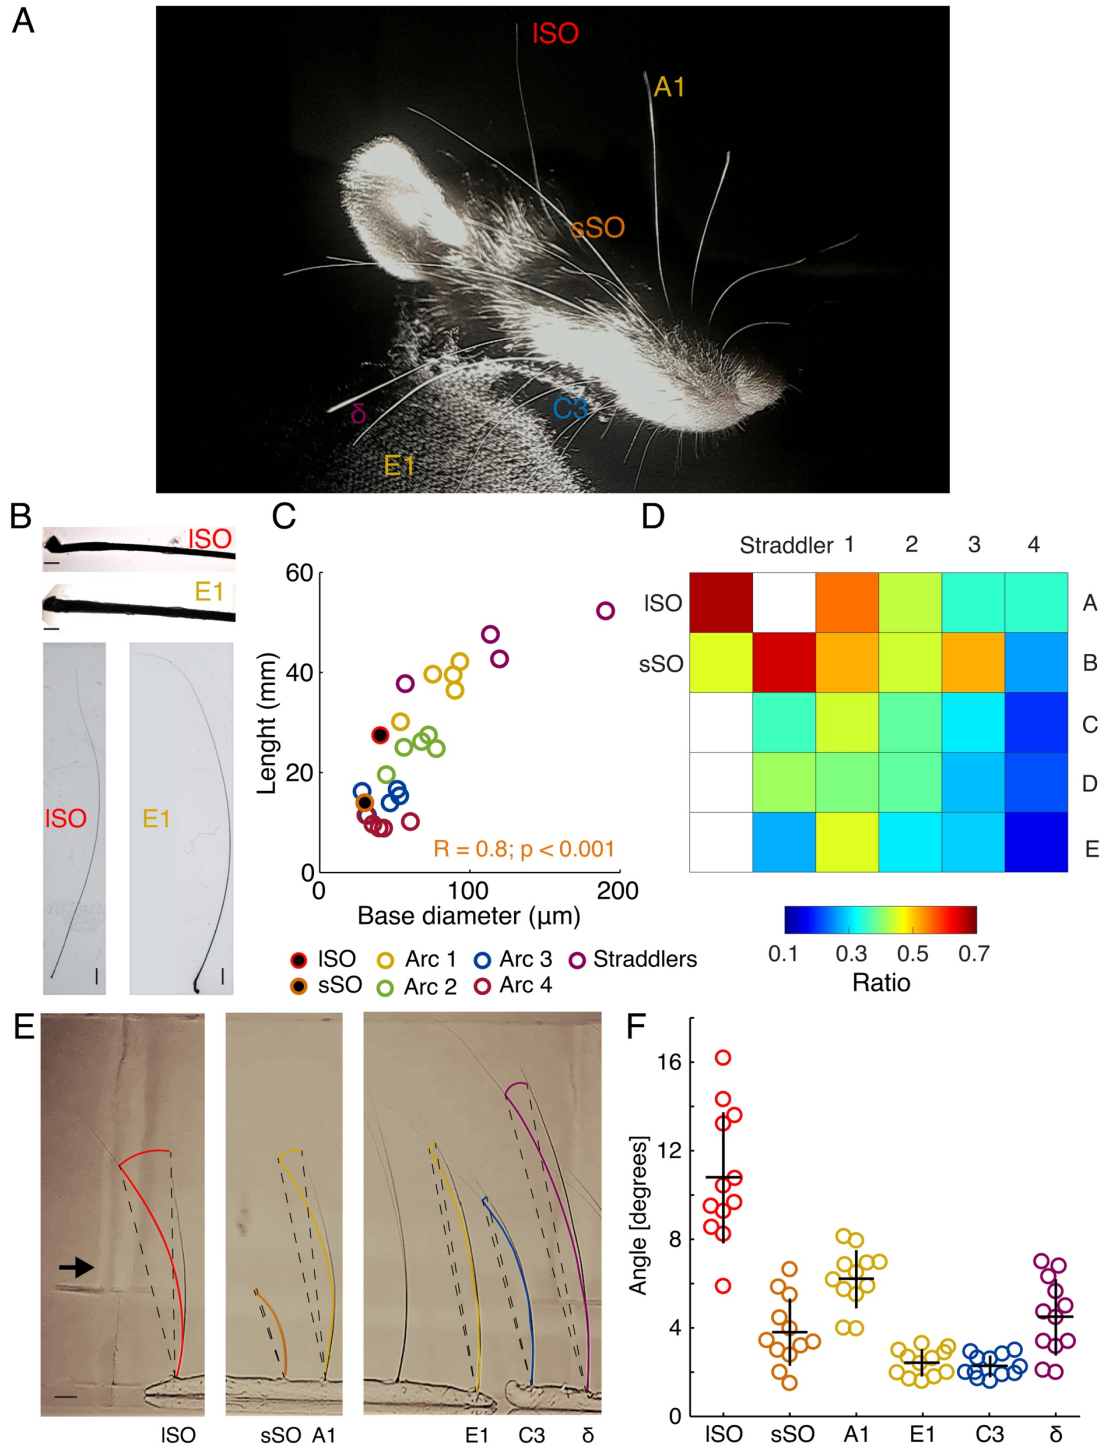



788

789 **Figure 2. Differential biomechanics determine rat whiskers air flow responses**

790 **A**, Head of a deeply anesthetized rat. Note the thin whisker diameter of the long supra-  
791 orbital (ISO) whisker.

792 **B**, Micrograph of the initial segments of ISO and E1 whiskers (top). Photograph of ISO  
793 and E1 whiskers (bottom). Scale 1 mm. Scale 100  $\mu\text{m}$ .

794 **C**, Whisker length plotted against whisker base diameter. Color coded by arcs, inside  
795 which length vary the less. Each data point represents the mean length or diameter of  
796 each whisker type ( $n = 4$ ). Spearman correlation indicated.

797 **D**, Heatmap of the ratio between whisker length and base diameter. Note that ISO has  
798 the highest ratio (see Fig. S1).

799 **E**, Whisker bending while blowing wind onto extracted whiskers *ex vivo*. Note:  
800 supraorbital whiskers and high and low length/diameter ratio whiskers where  
801 subsampled from the whisker pad. Bending angle was reconstructed by superimposing  
802 two frames of a video where minimal (rest, left) and maximal (full deflection, right)  
803 deflection in one whisker was achieved. In this picture, maximal ISO bending is shown.  
804 Color coded curves were drawn to fit 75% of the total whisker length. This partial  
805 length was employed to trace a radius (dashed lines) centered at the base of the whisker  
806 to calculate the bending angle. Approximate wind direction (black arrow). Scale 2 mm  
807 (black line, bottom left).

808 **F**, Bending angle for each whisker type (color coded). Each dot represents the  
809 deflection that a given whisker reached when itself or other whisker type reached its  
810 maximal bending. Kruskal-Wallis test on whisker type [ $H(5, 42) = 36.45, p < 0.0001$ ].  
811 Dunn's post-hoc test indicated that the ISO bending angle significantly differed from  
812 every other whisker (All  $p_s < 0.02$ ) except from A1. Meanwhile, A1 differed from C3  
813 and E1 ( $p_s < 0.01$ ). Black crosses indicate the mean and standard error.

814

815 See also Movie 2.

816

817

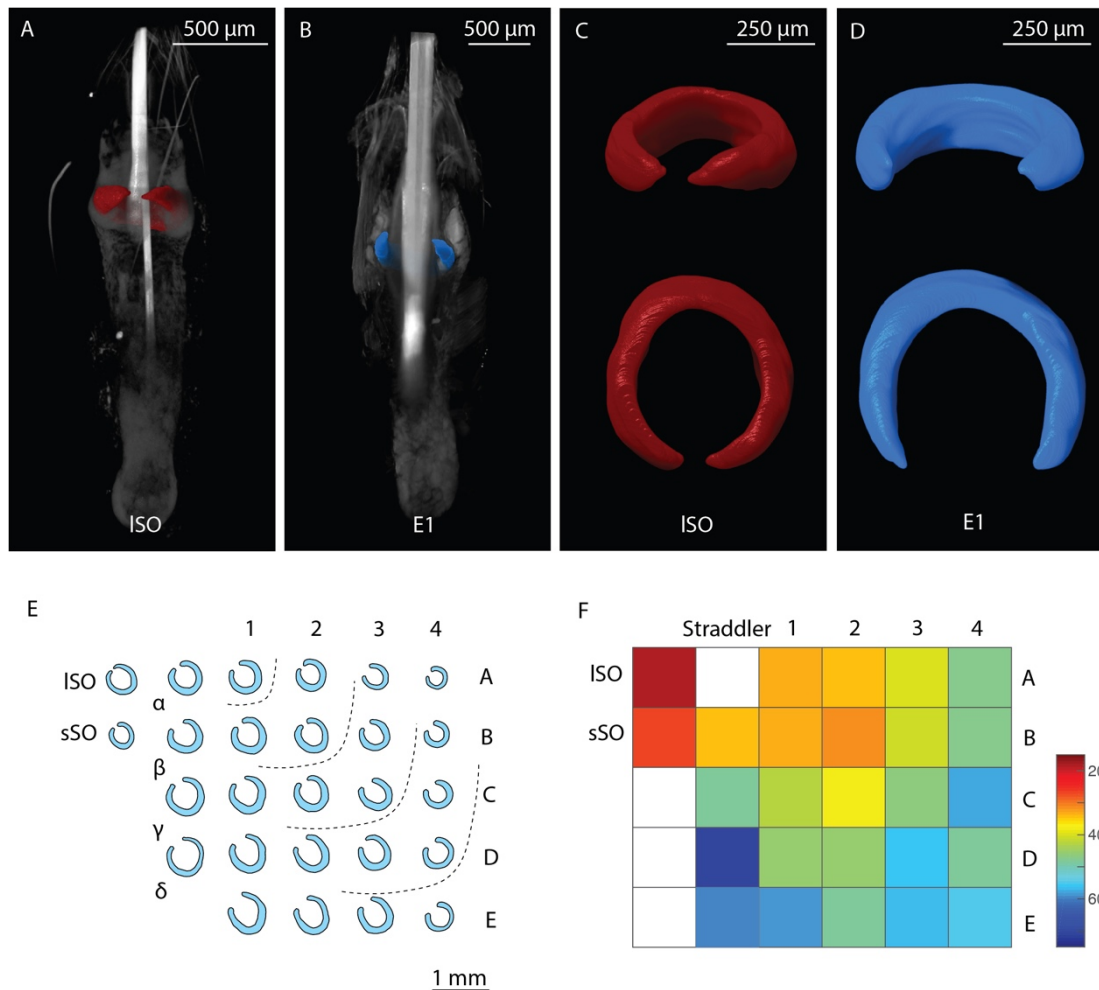

818  
819  
820  
821  
822  
823  
824  
825  
826  
827  
828  
829  
830  
831  
832  
833  
834  
835

**Figure 3. Supraorbital whiskers and other wind-sensitive whisker have more closed/ complete ring-wulst than non-wind-sensitive whiskers**

**A**, Micro-CT scan volume rendering of a large supra-orbital (ISO) vibrissa follicle. Gross anatomy is visualized in grey and ring-wulst reconstructions in color (red).

**B**, As (**A**) but for the E1 vibrissae follicle (blue ring wulst).

**C**, Reconstructed ISO ring-wulst from (**A**) in an oblique and top view.

**D**, Same as (**C**) but for the E1 follicle from (**B**). Note the markedly difference in the ring-wulst aperture angle between the wind sensitive ISO and non-wind sensitive E1 vibrissa.

**E**, Illustration of vibrissa ring-wulst shapes drawn from micro-CT scans. Dotted lines indicate a semi-circle like arrangement of vibrissae by ring-wulst aperture angles.

**F**, Heat map of ring-wulst aperture angles. Measurements were taken from the center of the (new) hair shaft to the most distal extension of the ring-wulst in the plane of maximum aperture ( $n = 5$ ). Color bar indicates closed (red) to rather open (blue) conformations.

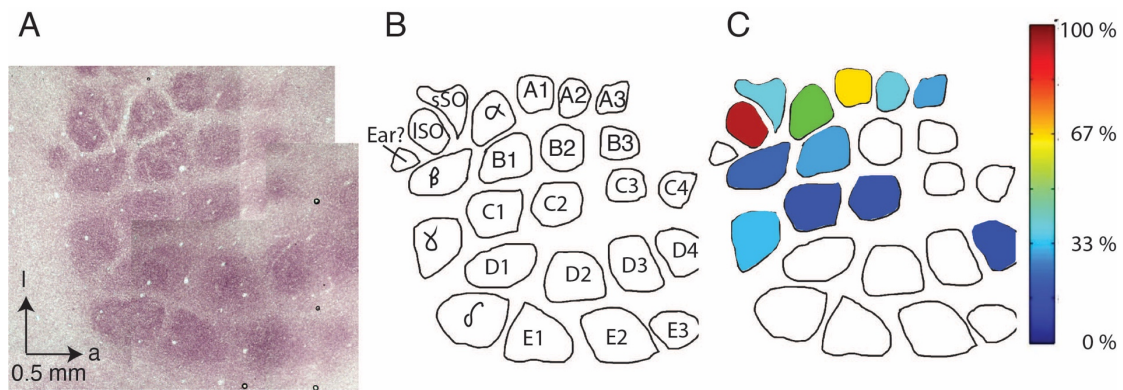

836

837

838 **Figure 4. Localization of supraorbital whisker barrels and relation of whisker**  
839 **airflow displacement to the cortical barrel map**

840 *A*, Cortical barrels in a tangential section through layer 4 of rat barrel cortex revealed  
841 staining for cytochrome oxidase reactivity; dark brown color indicates high reactivity.

842 a = anterior, l = lateral.

843 *B*, Drawing of cortical barrels (from *A*) with the positions of supraorbital whisker  
844 barrels. Short (sSO) and long (ISO) supraorbital whisker barrels were identified in four  
845 receptive field mapping experiments, in all cases posterior rather than lateral to α/A1  
846 whisker responses. Note that some anterior barrels (A4 and B4) and microvibrissae  
847 barrels are missing due to sectioning.

848 *C*, Whisker displacement under low airflow conditions was quantified, normalized  
849 to the maximal response, color coded and superimposed to the barrel map drawn in *B*. The  
850 data come from an airflow whisker displacement experiment on the head of the  
851 anesthetized animal analogous to the data shown in Figure 1F. Quantitative tracking  
852 data for whisker displacement were not available for all whiskers (hence the empty  
853 barrels). Qualitative assessment of D- and E-row whiskers suggested they show little  
854 air flow whisker displacement similar to the data of whisker D4 (also see Movie 1).  
855 Wind-responsive whiskers (with large airflow displacements) cluster in the  
856 posterolateral barrel map.

857

858

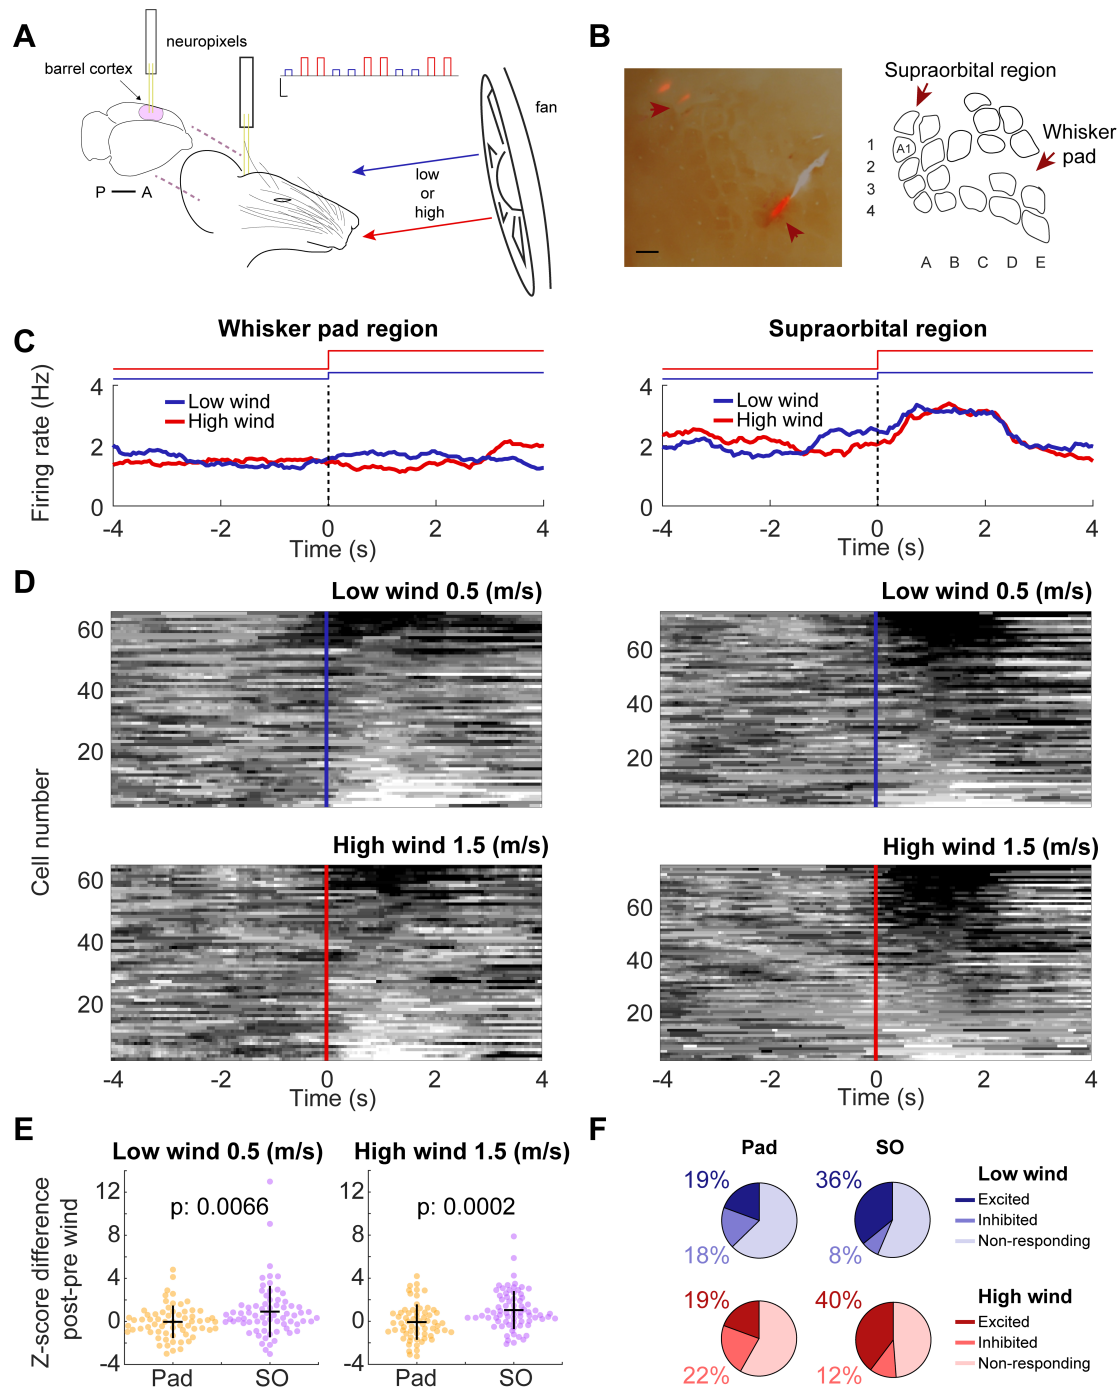

859  
860

861 **Figure 5. Supraorbital whisker cortex responds more strongly to wind stimuli**  
862 **than D/E-row barrel cortex**

863 *A*, Schematic of the experimental setup. Posteriorly and anteriorly placed Neuropixels  
864 probes were aimed to the supraorbital and the whisker pad regions of the barrel cortex,  
865 respectively. Simultaneous, contralateral recording of single units were made while  
866 blowing wind. Low (0.5 m/s, blue) or high (1.5 m/s, red) wind epochs (10 s) were blown  
867 in alternating order from a frontal fan placed 12.5 cm apart from the rat's head. Top  
868 right: schematic of the wind epochs in time (12-30 total wind epochs per rat). Scales,  
869 x: 10 s; y: 1.5 m/s.

870 **B**, Left: representative histology showing the two recording sites on the whisker pad  
871 and supraorbital regions of the barrel cortex. Scale: 500 $\mu$ m. Right: schematic  
872 reconstruction of the barrel cortex from successive flattened brain slices.

873 **C**, Representative examples of peri-wind stimulus firing rate of two single units  
874 recorded at the whisker pad (left) or supraorbital (right) regions in the low (blue) and  
875 high (red) wind conditions. Black dash lines and color code step lines on top indicate  
876 stimuli onset.

877 **D**, Heatmap of z-scored firing rate around wind stimuli (low wind, up; high wind,  
878 bottom) of single units recorded at the whisker pad (left) or supraorbital (right) regions.  
879 Positive z-scores indicate excitation (black). Negative z-scores indicate inhibition  
880 (white).

881 **E**, Z-scored firing rate for the difference between post vs. pre-wind stimulation in single  
882 units recorded at the whisker pad (yellow) or the supraorbital (lilac) regions for low  
883 (left) and high (right) wind conditions.

884 **F**, Percentages of excited ( $x > 1$  std), inhibited ( $x < 1$  std) and non-responding ( $1 \text{ std} >$   
885  $x < 1$  std) single units recorded at the whisker pad (left) or supraorbital (right) regions  
886 in the low (blue) and high (red) wind conditions.

887

888

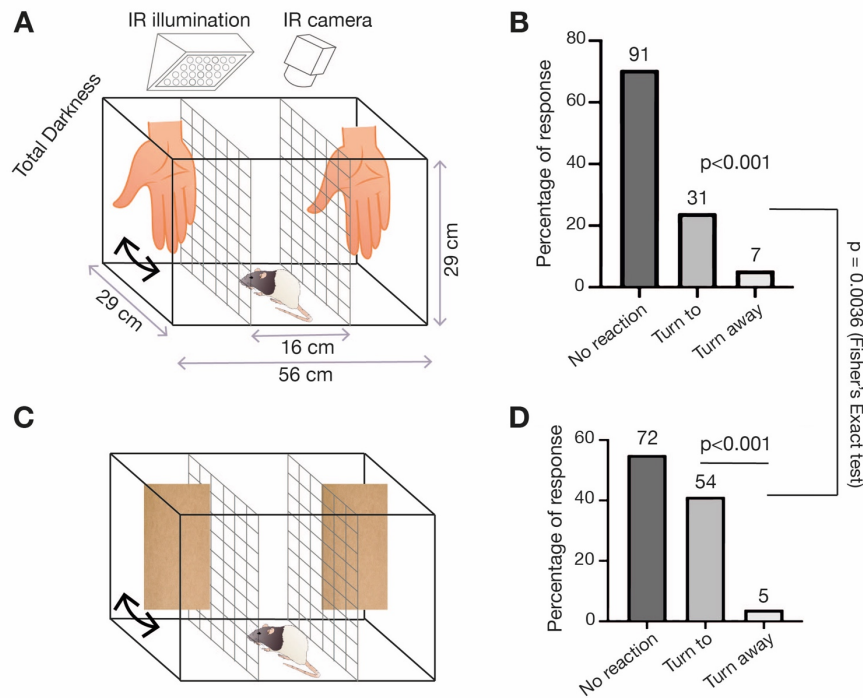

889

890 **Figure 6. Anemotaxic turning in rats**

891 **A**, The turning behavior arena is split into 3 sections separated by wire-mesh. The rat  
892 is placed in the middle compartment and airflow stimuli is applied by hand-flap in the  
893 left and right compartments. Left and right hand-flap stimuli were randomized and  
894 separated by 10 seconds each. The arena was illuminated with infrared light and filmed  
895 with an infrared-sensitive camera in total darkness.

896 **B**, Behavioral responses of rats ( $n = 7$ ) to hand-movement stimuli (0.5 seconds post  
897 stimulus) were assigned by forced choice to one of three categories: either no reaction  
898 or turning towards the stimulus or turning away from the stimulus. Rats were strongly  
899 biased to turn towards the hand-movement stimuli ( $p < 0.001$ ,  $\chi^2$  Test).

900 **C**, Cardboard-flaps are used to apply stronger airflow stimuli than the hand-flaps; the  
901 stimulation protocol is as in **A**.

902 **D**, Seven rats react to cardboard-flap movement stimuli from (**C**), scoring is done as in  
903 **B**. Rats were strongly biased to turn towards the hand-flap stimuli ( $p < 0.001$ ,  $\chi^2$  Test).  
904 Rats turn towards cardboard-flaps more frequently than to hand-flaps ( $p = 0.0036$ ,  
905 Fisher's Exact Test).

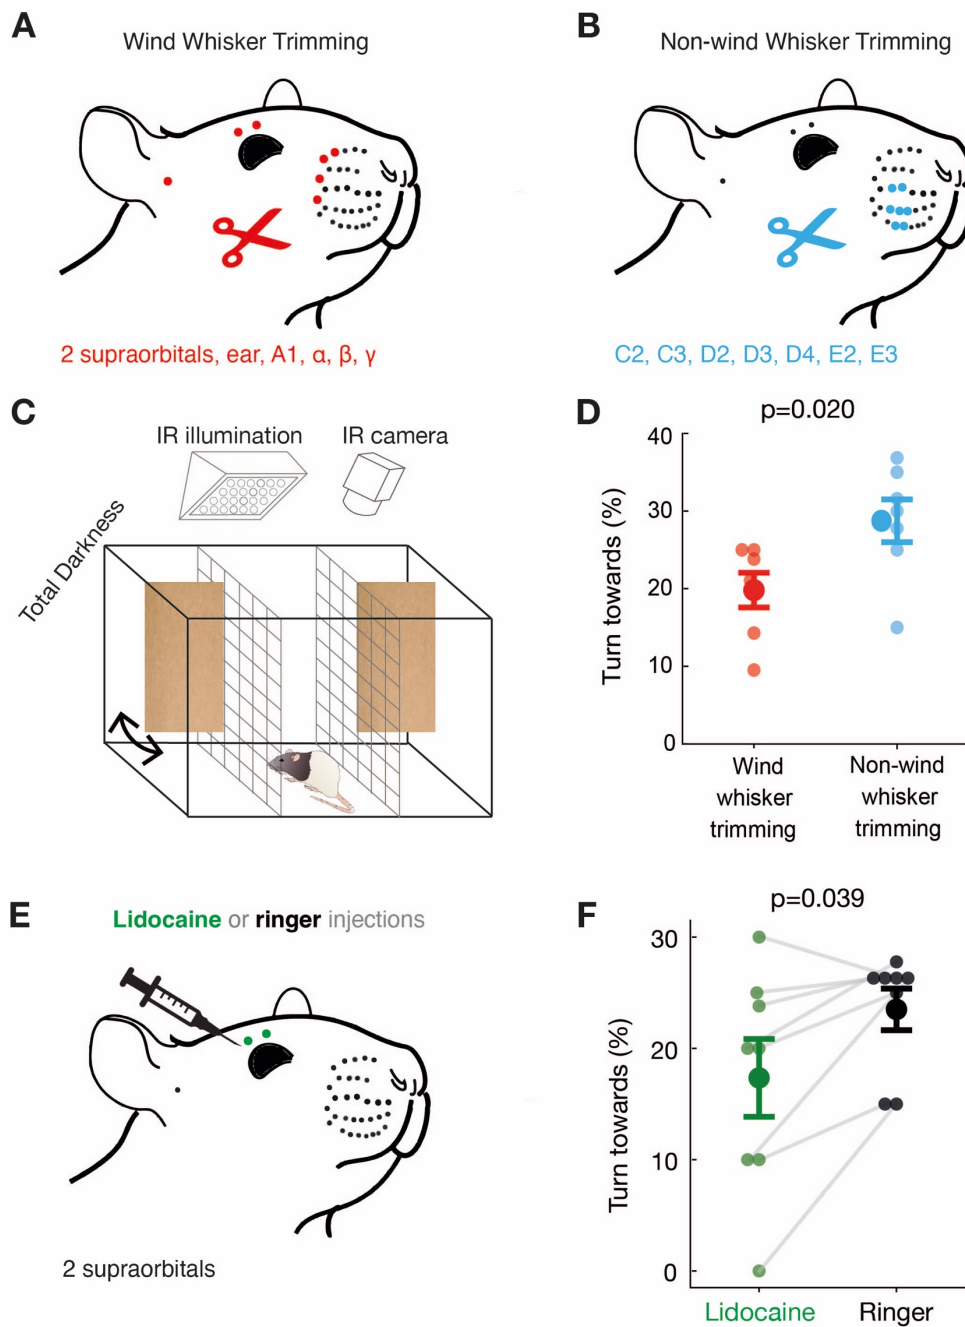

906

907

**Figure 7. Differential effects of wind-whisker trimming and supraorbital nerve blockade on rat airflow turning responses**

908

**A**, Wind-sensitive whiskers (2 supraorbital, ear, A1,  $\alpha$ ,  $\beta$ ,  $\gamma$  whiskers) were trimmed bilaterally in 7 rats.

910

**B**, Wind-insensitive whiskers (C2, C3, D2, D3, D4, E2 and E3) were trimmed bilaterally in another 7 rats.

911

**C**, Cardboard-flaps were used to deliver wind stimuli in the turning-behavior arena, each trial being separated by 10 seconds and at randomized positions; see Figure 4C.

912

**D**, Wind-whisker-trimmed animals (red) turn towards flaps less strongly ( $p=0.039$ , unpaired Mann-Whitney-U-test, two-tailed,  $N=7$  animals) than non-wind-whisker-trimmed animals (blue).

913

914

915

916

917

918 *E*, The supraorbital whisker follicles were targeted with lidocaine (green) or Ringer  
919 solution (gray) in 8 individuals in a paired procedure.

920 *F*, Lidocaine in supraorbital whiskers (green) significantly decreased airflow turning  
921 responses relative to Ringer injection ( $p = 0.02$ ; Wilcoxon signed-rank test, two-  
922 tailed,  $N = 8$  animals, 20 trials each).

923

924

925



926 **Supplementary Material**

927

928 **Movie 1.** Whisker movements in no (shielded) airflow conditions and low (ambient)  
929 airflow conditions. Note the selective engagement of supraorbital whiskers in low  
930 airflow conditions.

931 <https://figshare.com/s/f259cc52d7b7fae2976b>

932

933 **Movie 2.** Airflow whisker responses recorded *ex vivo* with extracted whiskers.

934 <https://figshare.com/s/9c9c2aca5f87ecab31b1>

935

936

937

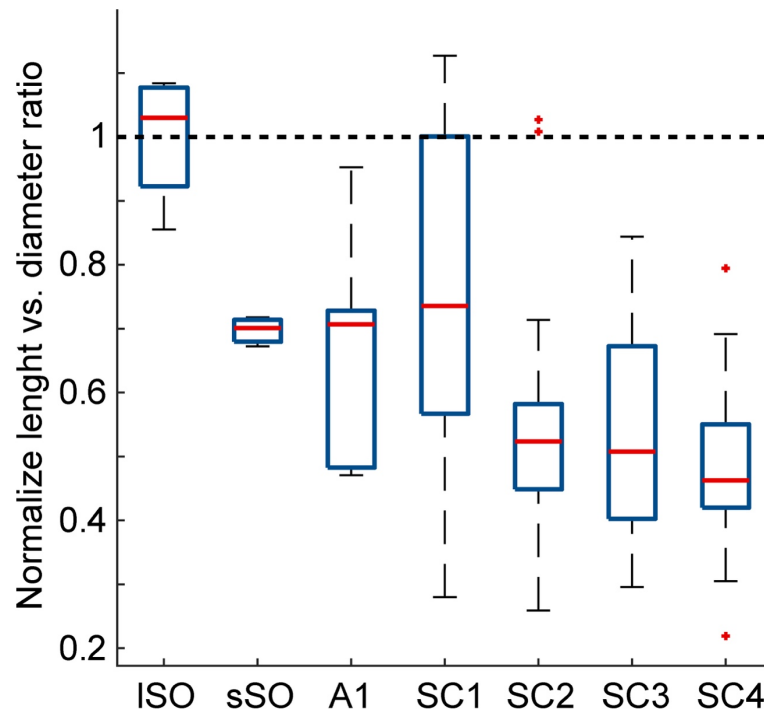

938

939

**Figure S1.**

940

A, Boxplot for the whisker length-diameter ratio normalized by the mean ISO ratio.

941

Ratios were arranged according to the semicircular configuration, which exhibited the

942

lowest observed p-value with respect to a shuffled distribution for that configuration

943

(semicircular, p-value = 0.018). See methods for a full list of p-values. Kruskal-Wallis

944

test, semicircular grouping as factor [ $H(6, 69) = 24.07, p = 0.0005$ ]. Tukey post hoc

945

indicated that groups SC2, 3 and 4 differed significantly from ISO ( $p < 0.04$ ).

946

Additionally, group SC1 differed from SC4 ( $p = 0.001$ ).

947

948

949

950

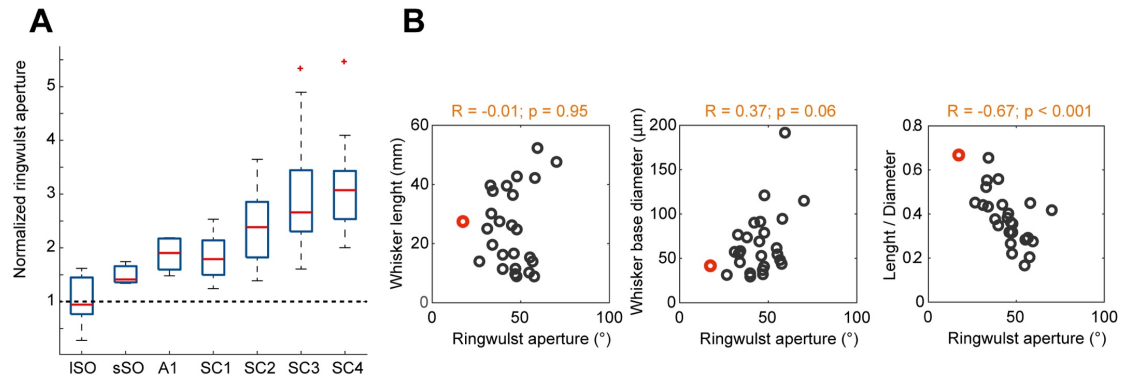

951

952

953 **Figure S2.**

954 **A**, Boxplot for the ring-wulst aperture normalized by the mean ISO aperture. Apertures  
955 were arranged according to a semicircular configuration, which exhibited the lowest  
956 observed p-value with respect to a shuffled distribution for that configuration  
957 (semicircular, p-value < 0.0001). See methods for a full list of p-values. Kruskal-Wallis  
958 test, semicircular grouping as factor [ $H(6, 122) = 61.69, p < 0.0001$ ]. Tuckey post hoc  
959 indicated that groups SC2, 3 and 4 differed significantly from ISO ( $p_s < 0.02$ ). In  
960 addition, SSO and SC1 differed from SC3 and 4 ( $p_s < 0.04$ ) and A1 from SC4 ( $p =$   
961 0.02). Finally, SC2 differed from SC 4 ( $p = 0.03$ ).

962 **B**, From left to right, Spearman correlations between: whisker length, whisker base  
963 diameter and the ratio between them and ring-wulst aperture. Only the length-diameter  
964 ratio was significantly correlated with ring-wulst aperture, indicative of an inverse  
965 relation between the variables ( $R = -0.67; p < 0.001$ ).

966

967

968

969

970
